# Supplementary material for: Microvolt T-wave alternans as a predictor of mortality and severe arrhythmias in patients with left-ventricular dysfunction: a systematic review and meta-analysis
Source: PubMed Central journal article supplement (PMC2653469; doi:10.1186/1471-2261-9-5), 2009-01-28
Supplement: 1471-2261-9-5-S1.pdf [file 1471-2261-9-5-S1.pdf]

## ADDITIONAL FILE 1 – QUALITY ASSESSMENT SCALE

---

### Quality Assessment

- Was the number of participants more than 50?  Yes  No  NA
- Was the number of participants more than 100?  Yes  No  NA
- Was the follow-up completed by more than 80% of the participants?  Yes  No  NA
- Were reasons for withdrawal from the study explained?  Yes  No  NA
- Were indeterminate test results included in the analysis?  Yes  No  NA
- Were the results interpreted correctly?  Yes  No  NA
- Was the study clinically relevant?  Yes  No  NA

SCORE (count YES, max. 7) .....

### Quality Classification:

- Good Quality: 6-7 items answered yes
- Moderate Quality: 4-5 items answered yes
- Poor Quality: 1-3 items answered yes
